# Supplementary material for: Clinical significance and potential mechanisms of the RNA methyltransferase KIAA1429 in osteosarcoma
Source: Research Square preprint supplement (doi:10.21203/rs.3.rs-227839/v1), 2021-02-23

**western blot images of KIAA1429**

**Yu Sun1#,****Yi-wu Lei2#, Shu-Fan Ji1, 3, Hao Wu1, Yun Liu1, Sheng-Lian Wen2, Ming-Hui Wei2, Gang Chen4*, Mao-Lin He1,3***


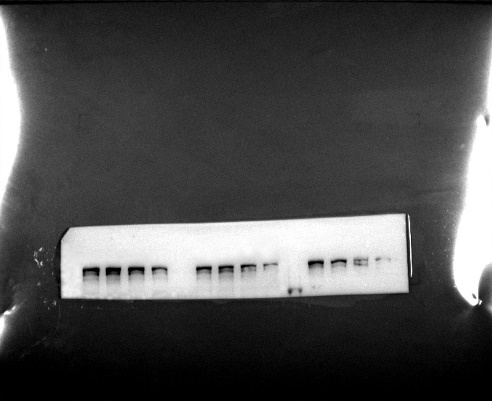

Supplement: Supplementary file 2 [file c075729014b0bd432b86f22f.docx]
